# Supplementary material
Source: MDPI journal article supplement (https://www.mdpi.com/2073-4441/14/24/4092)
Supplement: s1 [file s1]

**Table S2.** Concentrations (µg/g) of lipids and their oxidation products in Negev Loess deposits (means of triplicates).

|                    | C <sub>18:1ω9</sub> acid | C <sub>16:1ω7</sub> acid | C <sub>18:1ω7</sub> acid | C <sub>22:1ω13</sub> acid | Cholesterol    | Campesterol | Sitosterol | DHAA           | α-amyrin | β-amyrin |
|--------------------|--------------------------|--------------------------|--------------------------|---------------------------|----------------|-------------|------------|----------------|----------|----------|
| Residual compound  | 43.0                     | 5.8                      | 5.1                      | 6.4                       | 8.8            | 0.5         | 0.6        | 4.1            | 0.024    | 0.027    |
| Oxidation products | 1.4                      | 0.1                      | 0.09                     | 0.03                      | 0 <sup>a</sup> | 0.002       | 0.003      | 0 <sup>a</sup> | 0.017    | 0.05     |

<sup>a</sup> not detected (< LOD = 0.001 µg/g) (determined with a ratio signal to noise > 5)
