# Supplementary material
Source: MDPI journal article supplement (https://www.mdpi.com/2073-4441/14/24/4092)
Supplement: s1 [file s1]

**Table S3.** Concentrations of  $\alpha$ - and  $\beta$ -amyrin oxidation products before and after incubation in fresh water.

| Incubation time (h) | $\beta$ -amyrin oxidation products (ng/g) | $\alpha$ -amyrin oxidation products (ng/g) |
|---------------------|-------------------------------------------|--------------------------------------------|
| 0 (dry)             | 59.8                                      | 19.3                                       |
| 0 (dry)             | 53.5                                      | 18.4                                       |
| 0                   | 7.1                                       | 0.5                                        |
| 0                   | 9.1                                       | 1.2                                        |
| 12                  | 3.3                                       | 1.0                                        |
| 12                  | 10.4                                      | 1.7                                        |
| 24                  | 11.8                                      | 1.7                                        |
| 24                  | 20.3                                      | 2.7                                        |
| 96                  | 2.7                                       | 0.4                                        |
| 96                  | 7.8                                       | 0.5                                        |
