# Supplementary material
Source: MDPI journal article supplement (https://www.mdpi.com/2073-4441/14/24/4092)
Supplement: s1 [file s1]

**Table S1.** Concentrations of the different lipids detected in Negev loess deposits (results of triplicates).

|                                                           | Concentration 1 | Concentration 2 | Concentration 3 |
|-----------------------------------------------------------|-----------------|-----------------|-----------------|
| Saturated fatty acids (C <sub>12</sub> -C <sub>18</sub> ) | 1.3 µg/mg       | 0.9 µg/mg       | 0.7 µg/mg       |
| Oleic acid                                                | 53.3 ng/mg      | 42.5 ng/mg      | 33.3 ng/mg      |
| Vaccenic acid                                             | 6.6 ng/mg       | 4.3 ng/mg       | 4.5 ng/mg       |
| Linoleic acid                                             | 9.2 ng/mg       | 8.1 ng/mg       | 7.4 ng/mg       |
| Erucic acid                                               | 7.4 ng/mg       | 7.0 ng/mg       | 4.9 ng/mg       |
| ω,(9-10)-dihydroxy-C <sub>16:0</sub> acid                 | 24.5 ng/mg      | 23.0 ng/mg      | 19.3 ng/mg      |
| 9,10-epoxy-C <sub>18:0</sub> acid                         | 10.5 ng/mg      | 11.9 ng/mg      | 8.2 ng/mg       |
| Dehydroabietic acid                                       | 4.1 ng/mg       | 5.9 ng/mg       | 2.2 ng/mg       |
| <i>p</i> -coumaric acid                                   | 0.7 ng /mg      | 0.6 ng/mg       | 0.6 ng/mg       |
| Ferulic acid                                              | 2.6 ng/mg       | 2.5 ng/mg       | 2.1 ng/mg       |
| Cholesterol                                               | 12.1 ng/mg      | 8.2 ng/mg       | 6.1 ng/mg       |
| Campesterol                                               | 0.6 ng/mg       | 0.5 ng/mg       | 0.5 ng/mg       |
| Sitosterol                                                | 0.7 ng/mg       | 0.5 ng/mg       | 0.6 ng/mg       |
| Ergosterol                                                | 0.3 ng/mg       | 0.3 ng/mg       | 0.4 ng/mg       |
| α-amyrin                                                  | 33.5 pg/mg      | 18.3 pg/mg      | 24.2 pg/mg      |
| β-amyrin                                                  | 30.8 pg/mg      | 23.9 pg/mg      | 25.1 pg/mg      |
